# Supplementary material for: Tracing cytotoxic effects of small organic Se species in human liver cells back to total cellular Se and Se metabolites
Source: Royal Society of Chemistry journal article supplement (doi:10.1039/c6mt00300a), 2017-01-01
Supplement: c6mt00300a2.pdf [file c6mt00300a2.pdf]

Supplementary figure 1

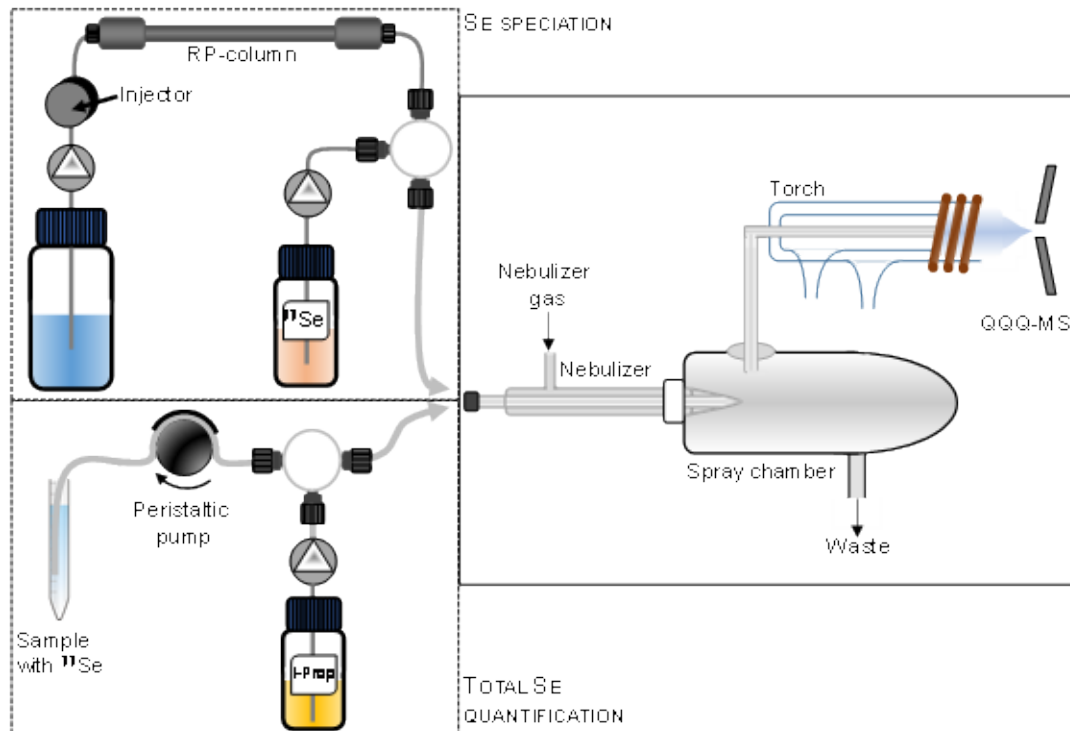

Supplementary figure 1: Instrumental set-up for Se speciation and total Se quantification using ID-(HPLC)-ICP-QQQ-MS.

## Supplementary figure 2

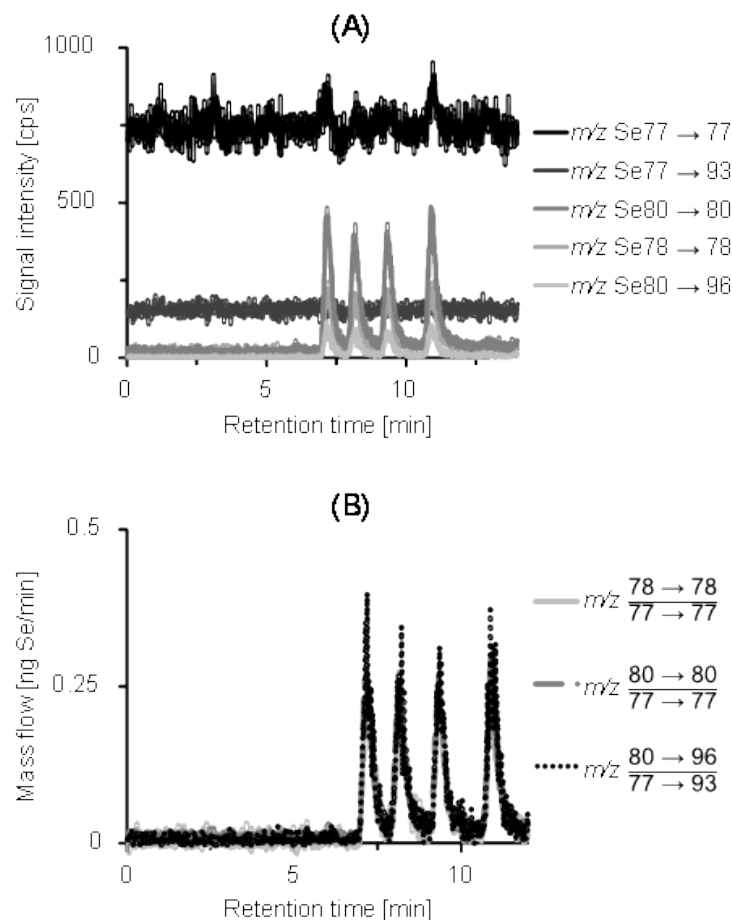

Supplementary figure 2: Standard reference chromatogram of 5  $\mu\text{g/L}$  MeSeCys (7.3 min), TMSe (8.4 min), SeMet (9.6 min) and SeSugar 1 (11.1 min) (A) and the corresponding mass flow chromatogram (B). Chromatographic separation was performed on a YMC-TriartPFP column (3  $\mu\text{m}$ , 3 x 250 mm) at 30  $^{\circ}\text{C}$  with 250  $\mu\text{L/min}$  20 mM ammonium formate (pH 3, 3% methanol) as mobile phase.
